# Supplementary material for: Mechanistic insights into the optical limiting performance of carbonaceous nanomaterials embedded with core–shell type graphite encapsulated Co nanoparticles
Source: Royal Society of Chemistry journal article supplement (doi:10.1039/d0cp03328f), 2020-01-01
Supplement: d0cp03328f1.pdf [file d0cp03328f1.pdf]

## Supporting information on

### Mechanistic insights into the optical limiting performance of carbonaceous nanomaterials embedded with core-shell type graphite encapsulated Co nanoparticles

Rajeev Kumar<sup>a</sup>, Ajay Kumar<sup>b</sup>, Nancy Verma<sup>b</sup>, Reji Philip<sup>b</sup> and Balaram Sahoo<sup>a,†</sup>

<sup>a</sup>Materials Research Centre, Indian Institute of Science, Bangalore, India -560012

<sup>b</sup>Raman Research Institute, Bangalore, India-560080

#### Details of the instruments used in characterization

The synthesized samples were characterized by Electron microscopy (SEM, TEM), powder X-ray diffraction (XRD), UV-DRS spectroscopy and Raman spectroscopy. SEM images were recorded in Ultra 55 Scanning electron microscope. JEOL-350 kV TEM was used to obtain the transmission electron micrographs of the samples drop-cast onto carbon-coated Cu grids (300 mesh size). XRD patterns were obtained by PANalytical X-Ray diffractometer in the  $2\theta$  range of  $5-90^\circ$ . UV-DRS spectra were recorded using powder samples in Lamda 750-Perkin-Elmer UV-Vis-NIR spectrometer. Raman spectra were recorded using 532 nm laser on LabRam HR instrument.

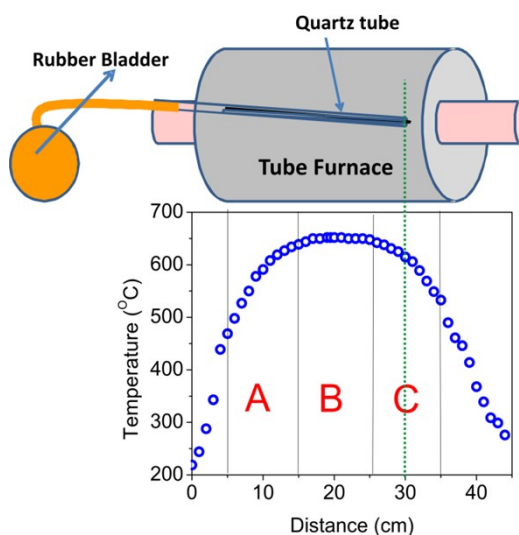

**Figure S1.** Schematic of the synthesis setup.

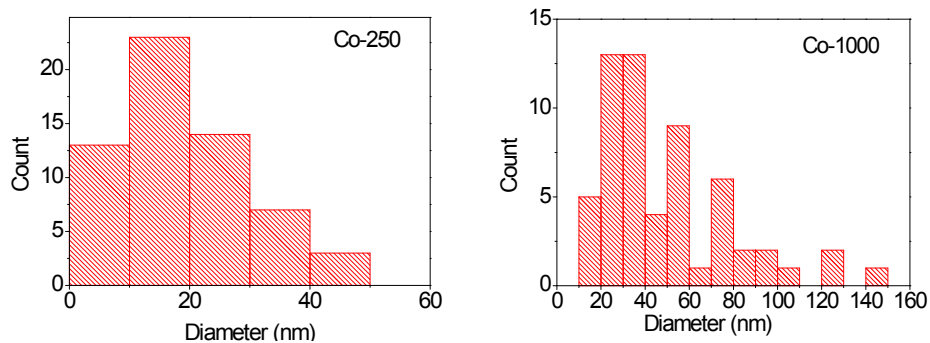

**Figure S2.** Particle size distribution of the core-nanoparticles in Co-250 and Co-1000 samples, calculated from TEM images.

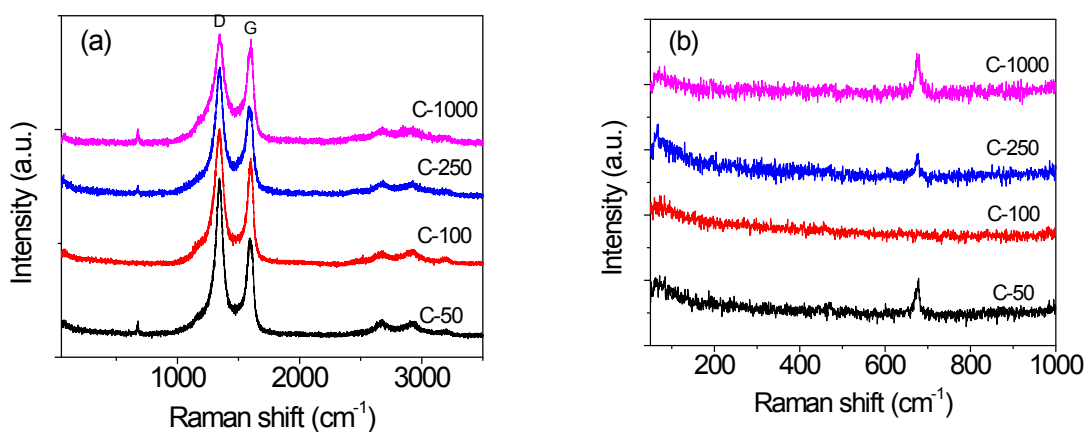

**Figure S3.** (a) Raman spectra for the synthesized samples. (b) Zoomed-in view of the Raman spectra showing CoO peak.

**Table S1.**  $I_G/I_D$  ratios and graphitic crystallite size ( $L_a$ ) obtained from Raman spectral peak-fits.

| Sample  | $I_G/I_D$ | $I_G/I_{D2}$ | $I_G/I_{D3}$ | $L_a$ (nm) |
|---------|-----------|--------------|--------------|------------|
| Co-50   | 0.241     | 3.06         | 1.04         | 4.63       |
| Co-100  | 0.277     | 3.03         | 1.54         | 5.32       |
| Co-250  | 0.294     | 2.70         | 1.28         | 5.65       |
| Co-1000 | 0.331     | 2.71         | 3.46         | 6.36       |

$L_a$  was calculated using the equation <sup>1</sup>:

$$L_a = (2.4 \times 10^{-10})(\lambda^4)(I_D/I_G)^{-1}$$

Ref:

(1) Cañado, L. G.; Takai, K.; Enoki, T.; Endo, M.; Kim, Y. A.; Mizusaki, H.; Jorio, A.; Coelho, L. N.; Magalhães-Paniago, R.; Pimenta, M. A. *Appl. Phys. Lett.* **2006**, 88 (16), 2–5.

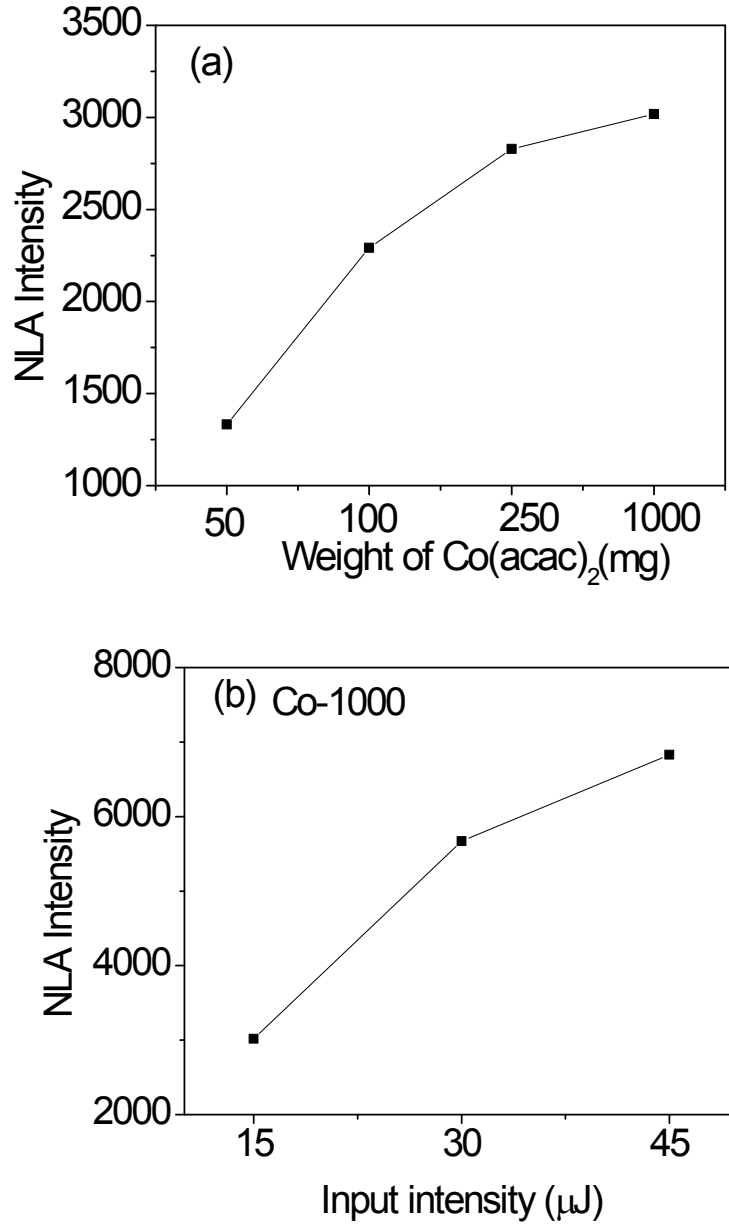

**Figure S4.** Variation of the strength of absorptive nonlinearity with (a) weight of Co(acac)<sub>2</sub> precursor, and (b) input intensity (for the Co-1000 sample).

*Calculation of Urbach energy ( $E_u$ ) using Kubelka-Munk plots*

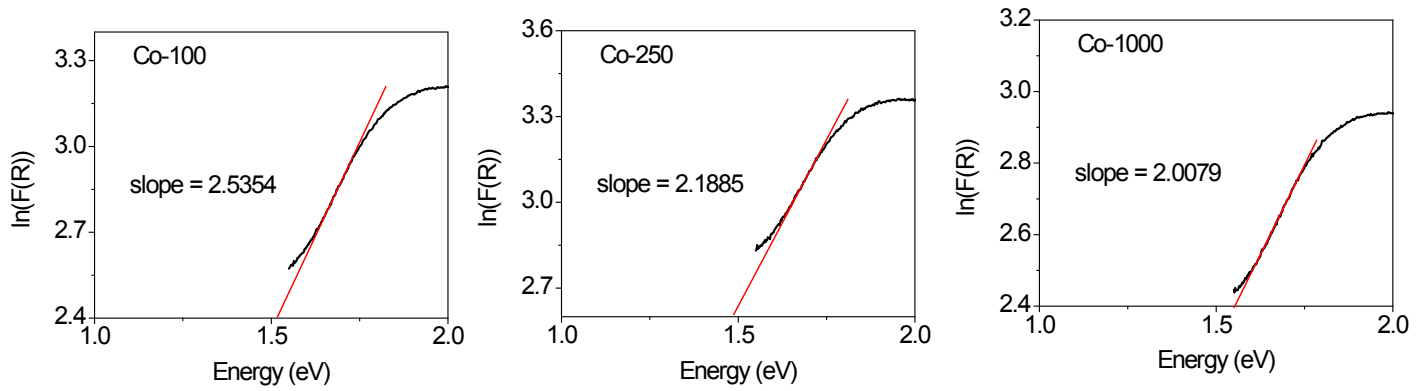

**Fig S5.**  $\ln(F(R))$  versus energy plots for the calculation of Urbach energy.

For Co-100 sample:  $E_u = 1/(2.5354) = 394$  meV

For Co-250 sample:  $E_u = 1/(2.1885) = 457$  meV

For Co-1000 sample:  $E_u = 1/(2.0079) = 498$  meV

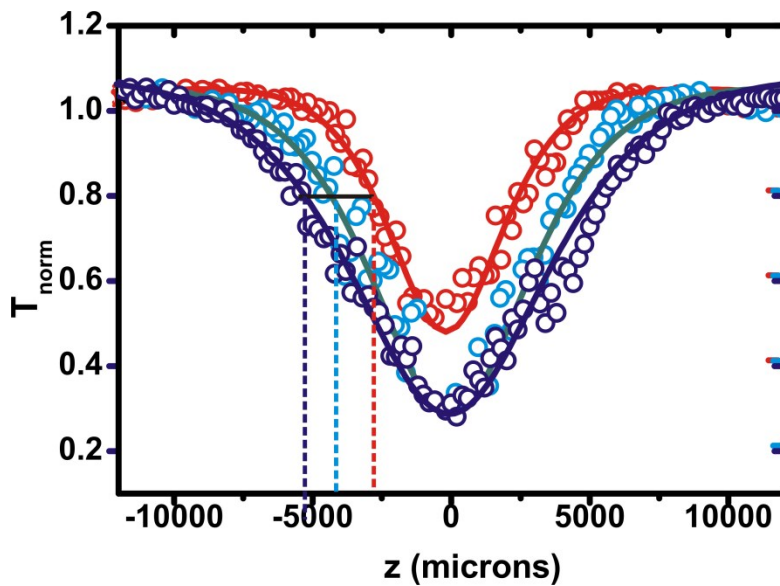

**Fig S6.** Overlapped Z-scan spectra for Co-1000 sample at different laser intensities. The Z-scan curves corresponding to 15, 30 and 45  $\mu\text{J}$  are shown in red, blue and purple respectively.
